# Supplementary material for: Spatial interplay of lymphocytes and fibroblasts in estrogen receptor-positive HER2-negative breast cancer
Source: PubMed Central journal article supplement (PMC9051105; doi:10.1038/s41523-022-00416-y), 2022-04-28
Supplement: 41523_2022_416_MOESM1_ESM.pdf [file 41523_2022_416_MOESM1_ESM.pdf]

## **Supplementary Figures and Tables**

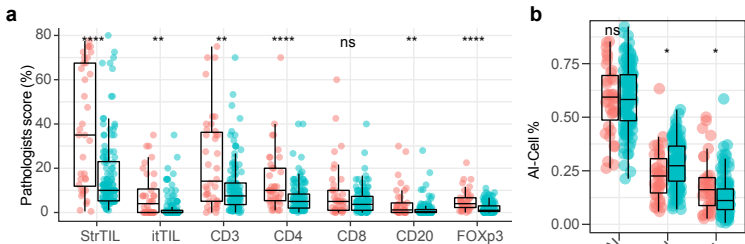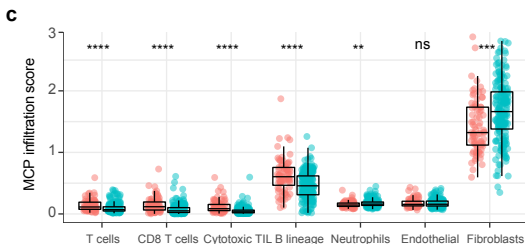

**d** ICGC pathologist TILs score vs TILs-AI (R-Sq: 0.176 - PCC: 0.420)

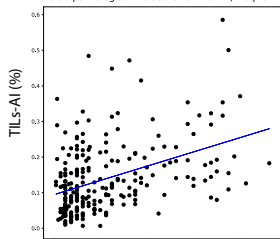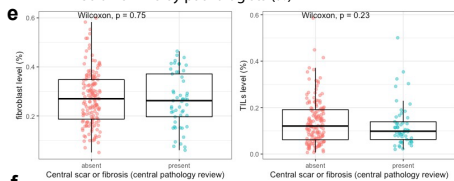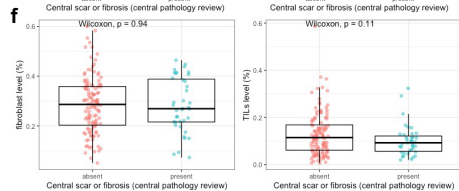

**Supplementary Figure 1. Lymphocytes and fibroblasts in the tumor microenvironment of ER<sup>+</sup> and ER<sup>-</sup> breast cancer (ICGC cohort).**

**(a)** Lymphocyte levels in ER<sup>+</sup> ( $N=179$ ) and ER<sup>-</sup> ( $N=56$ ) breast tumors scored by pathologists on H&E-stained slides or immunohistochemically stained. **(b)** Cell proportions as a result from the deep learning model for tumor-AI, fibro-AI and TILs-AI, separated by ER status. **(c)** Immune cells levels calculated by MCP-counter in ER<sup>+</sup> and ER<sup>-</sup> breast tumors. **(d)** R-sq between TILs-AI and sTILs scored by pathologists. **(e)** TILs-AI and Fibro-AI levels (fraction 0-1) in all ICGC samples with and without a fibrotic scar as scored on central pathology review. **(f)** TILs-AI and Fibro-AI levels (fraction 0-1) in all ICGC ER<sup>+</sup> samples ( $n=179$ ) with and without a fibrotic scar as scored on central pathology review. (\* $P < 0.05$ ; \*\* $P < 0.01$ ; \*\*\*  $P < 0.001$ ; \*\*\*\*  $P < 0.0001$ ; NS, not significant by Wilcoxon-rank test. All boxplots show median, lower and upper hinges correspond to the 25<sup>th</sup> and 75<sup>th</sup> percentile.

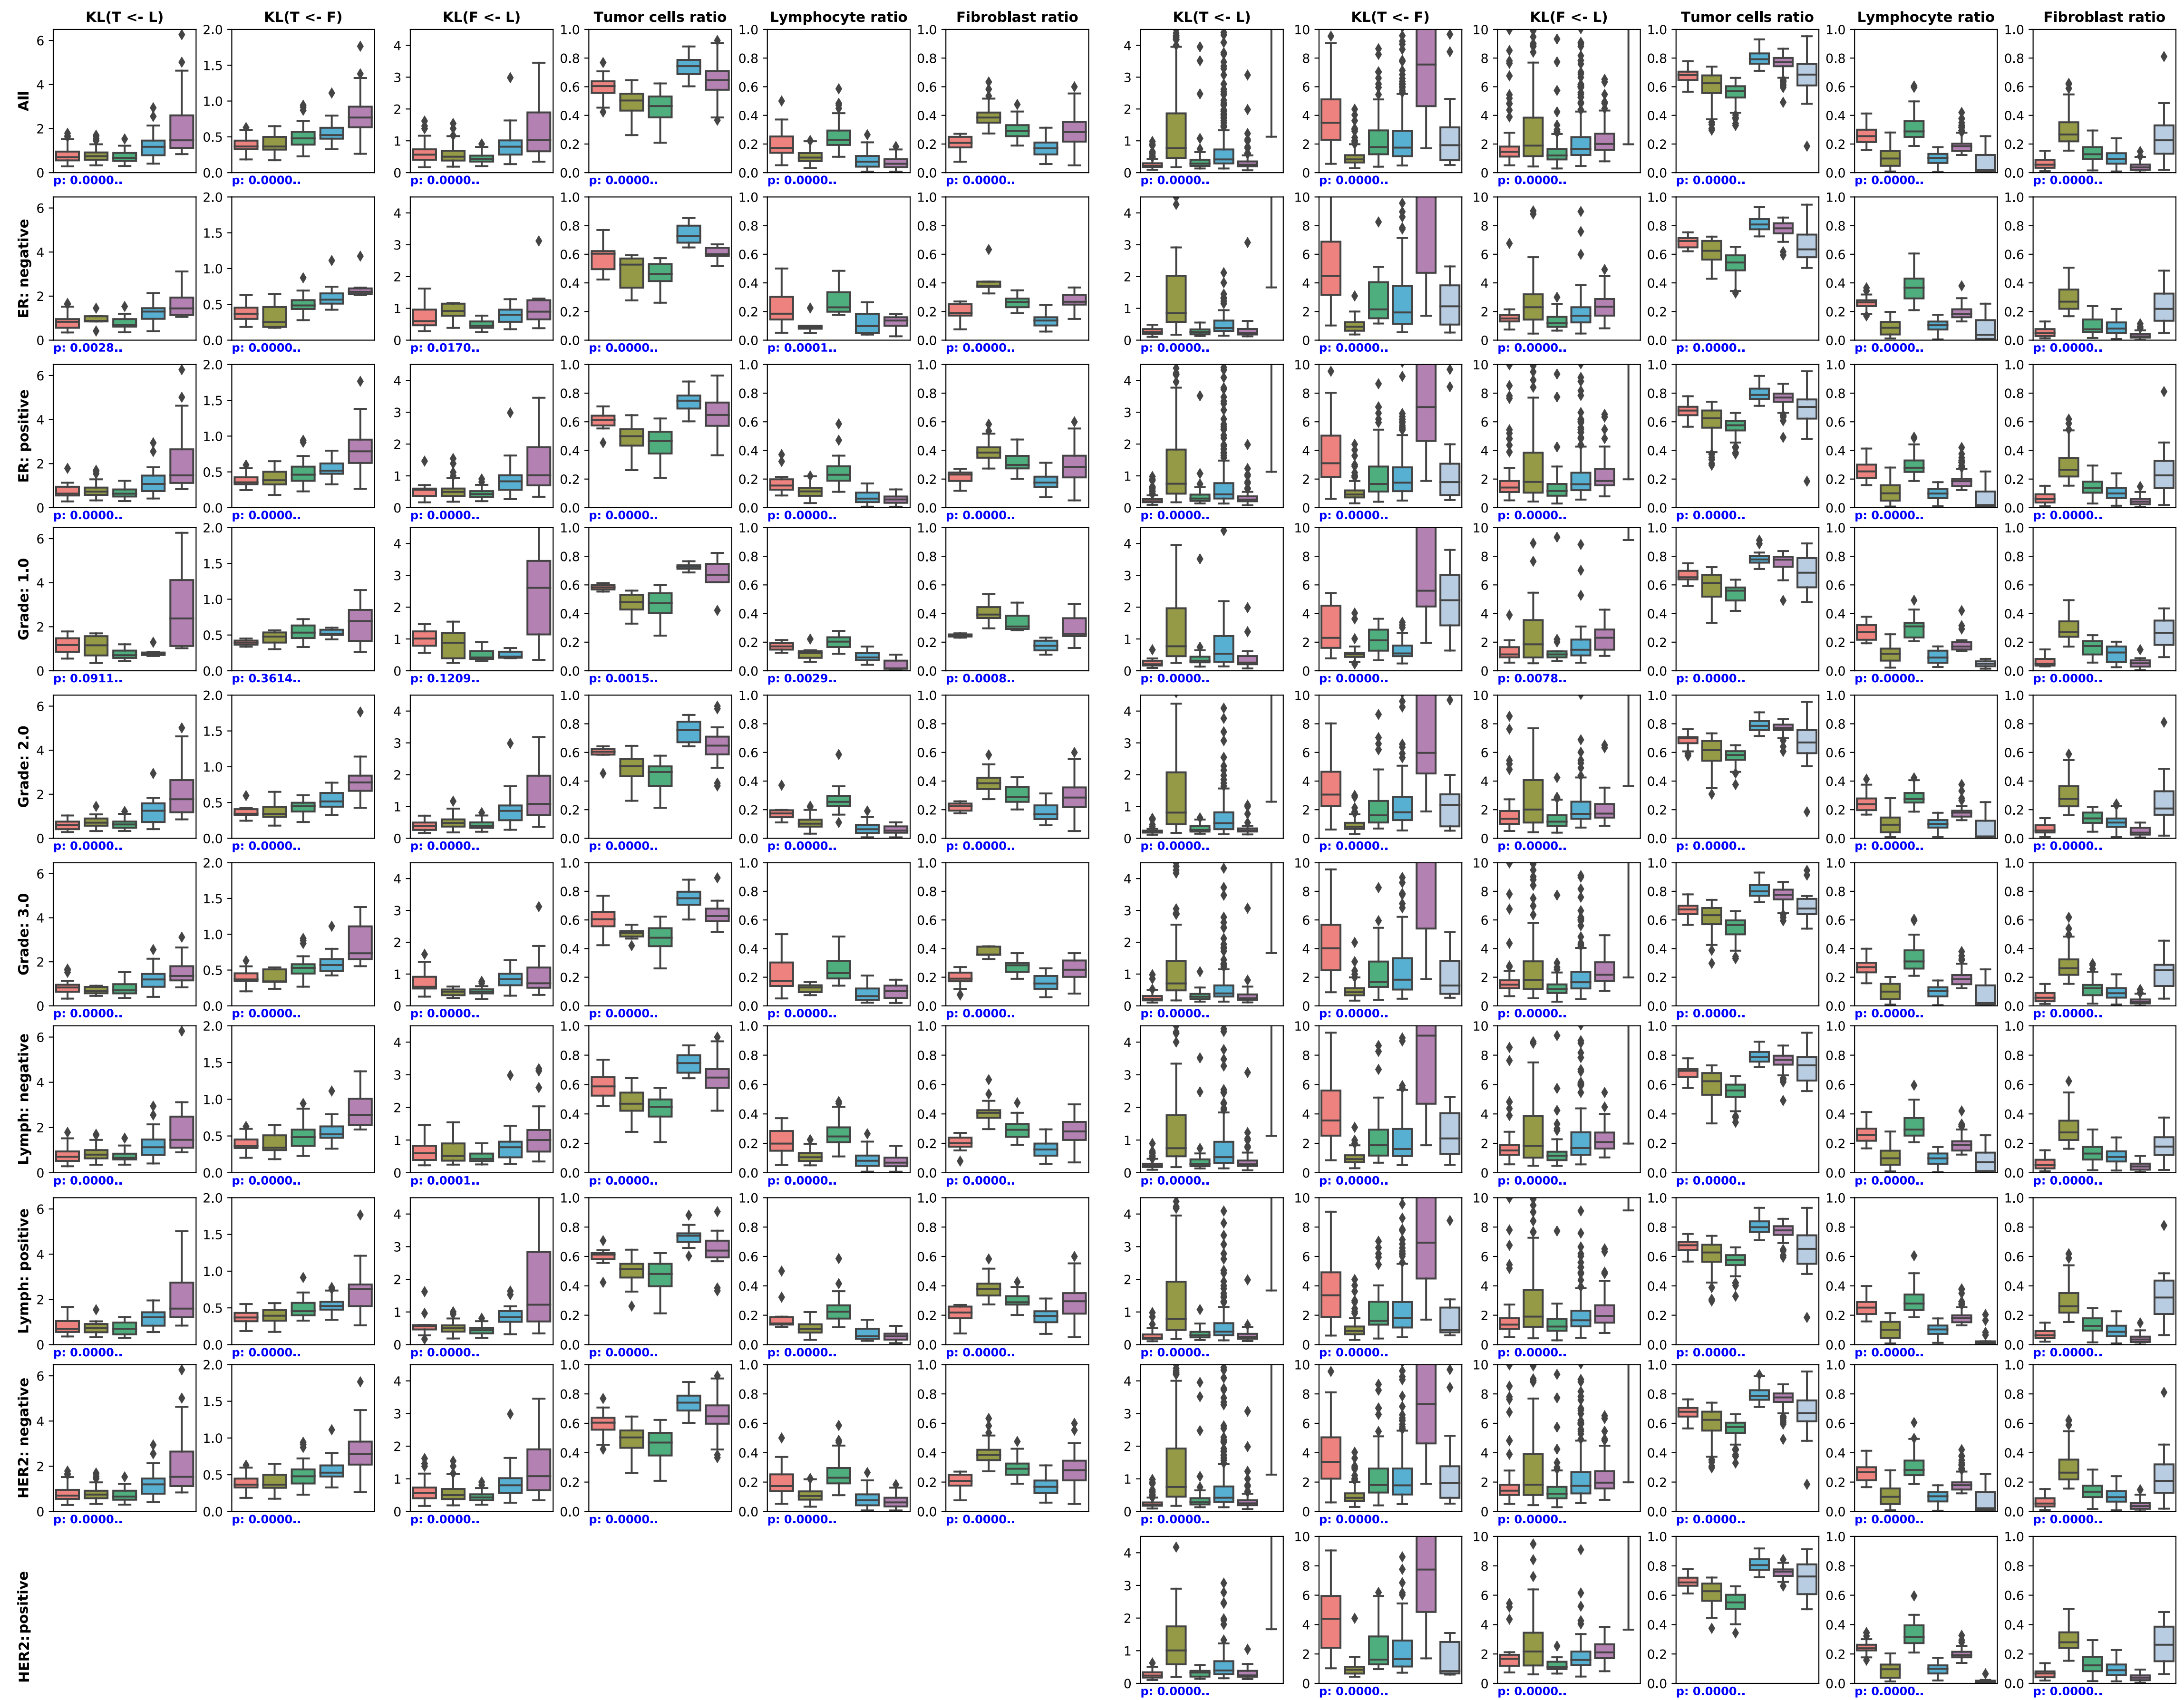



**Supplementary Figure 2.** The boxplots for ICGC (left) and METABRIC (right) for the 6 measures (horizontal) used in the model for all samples, and stratified according to clinical parameters (vertical), including ER status, HER2 status, lymph node status and grade. Boxplots show median, lower and upper hinges correspond to the 25<sup>th</sup> and 75<sup>th</sup> percentile. All P-values by Wilcoxon-rank test.

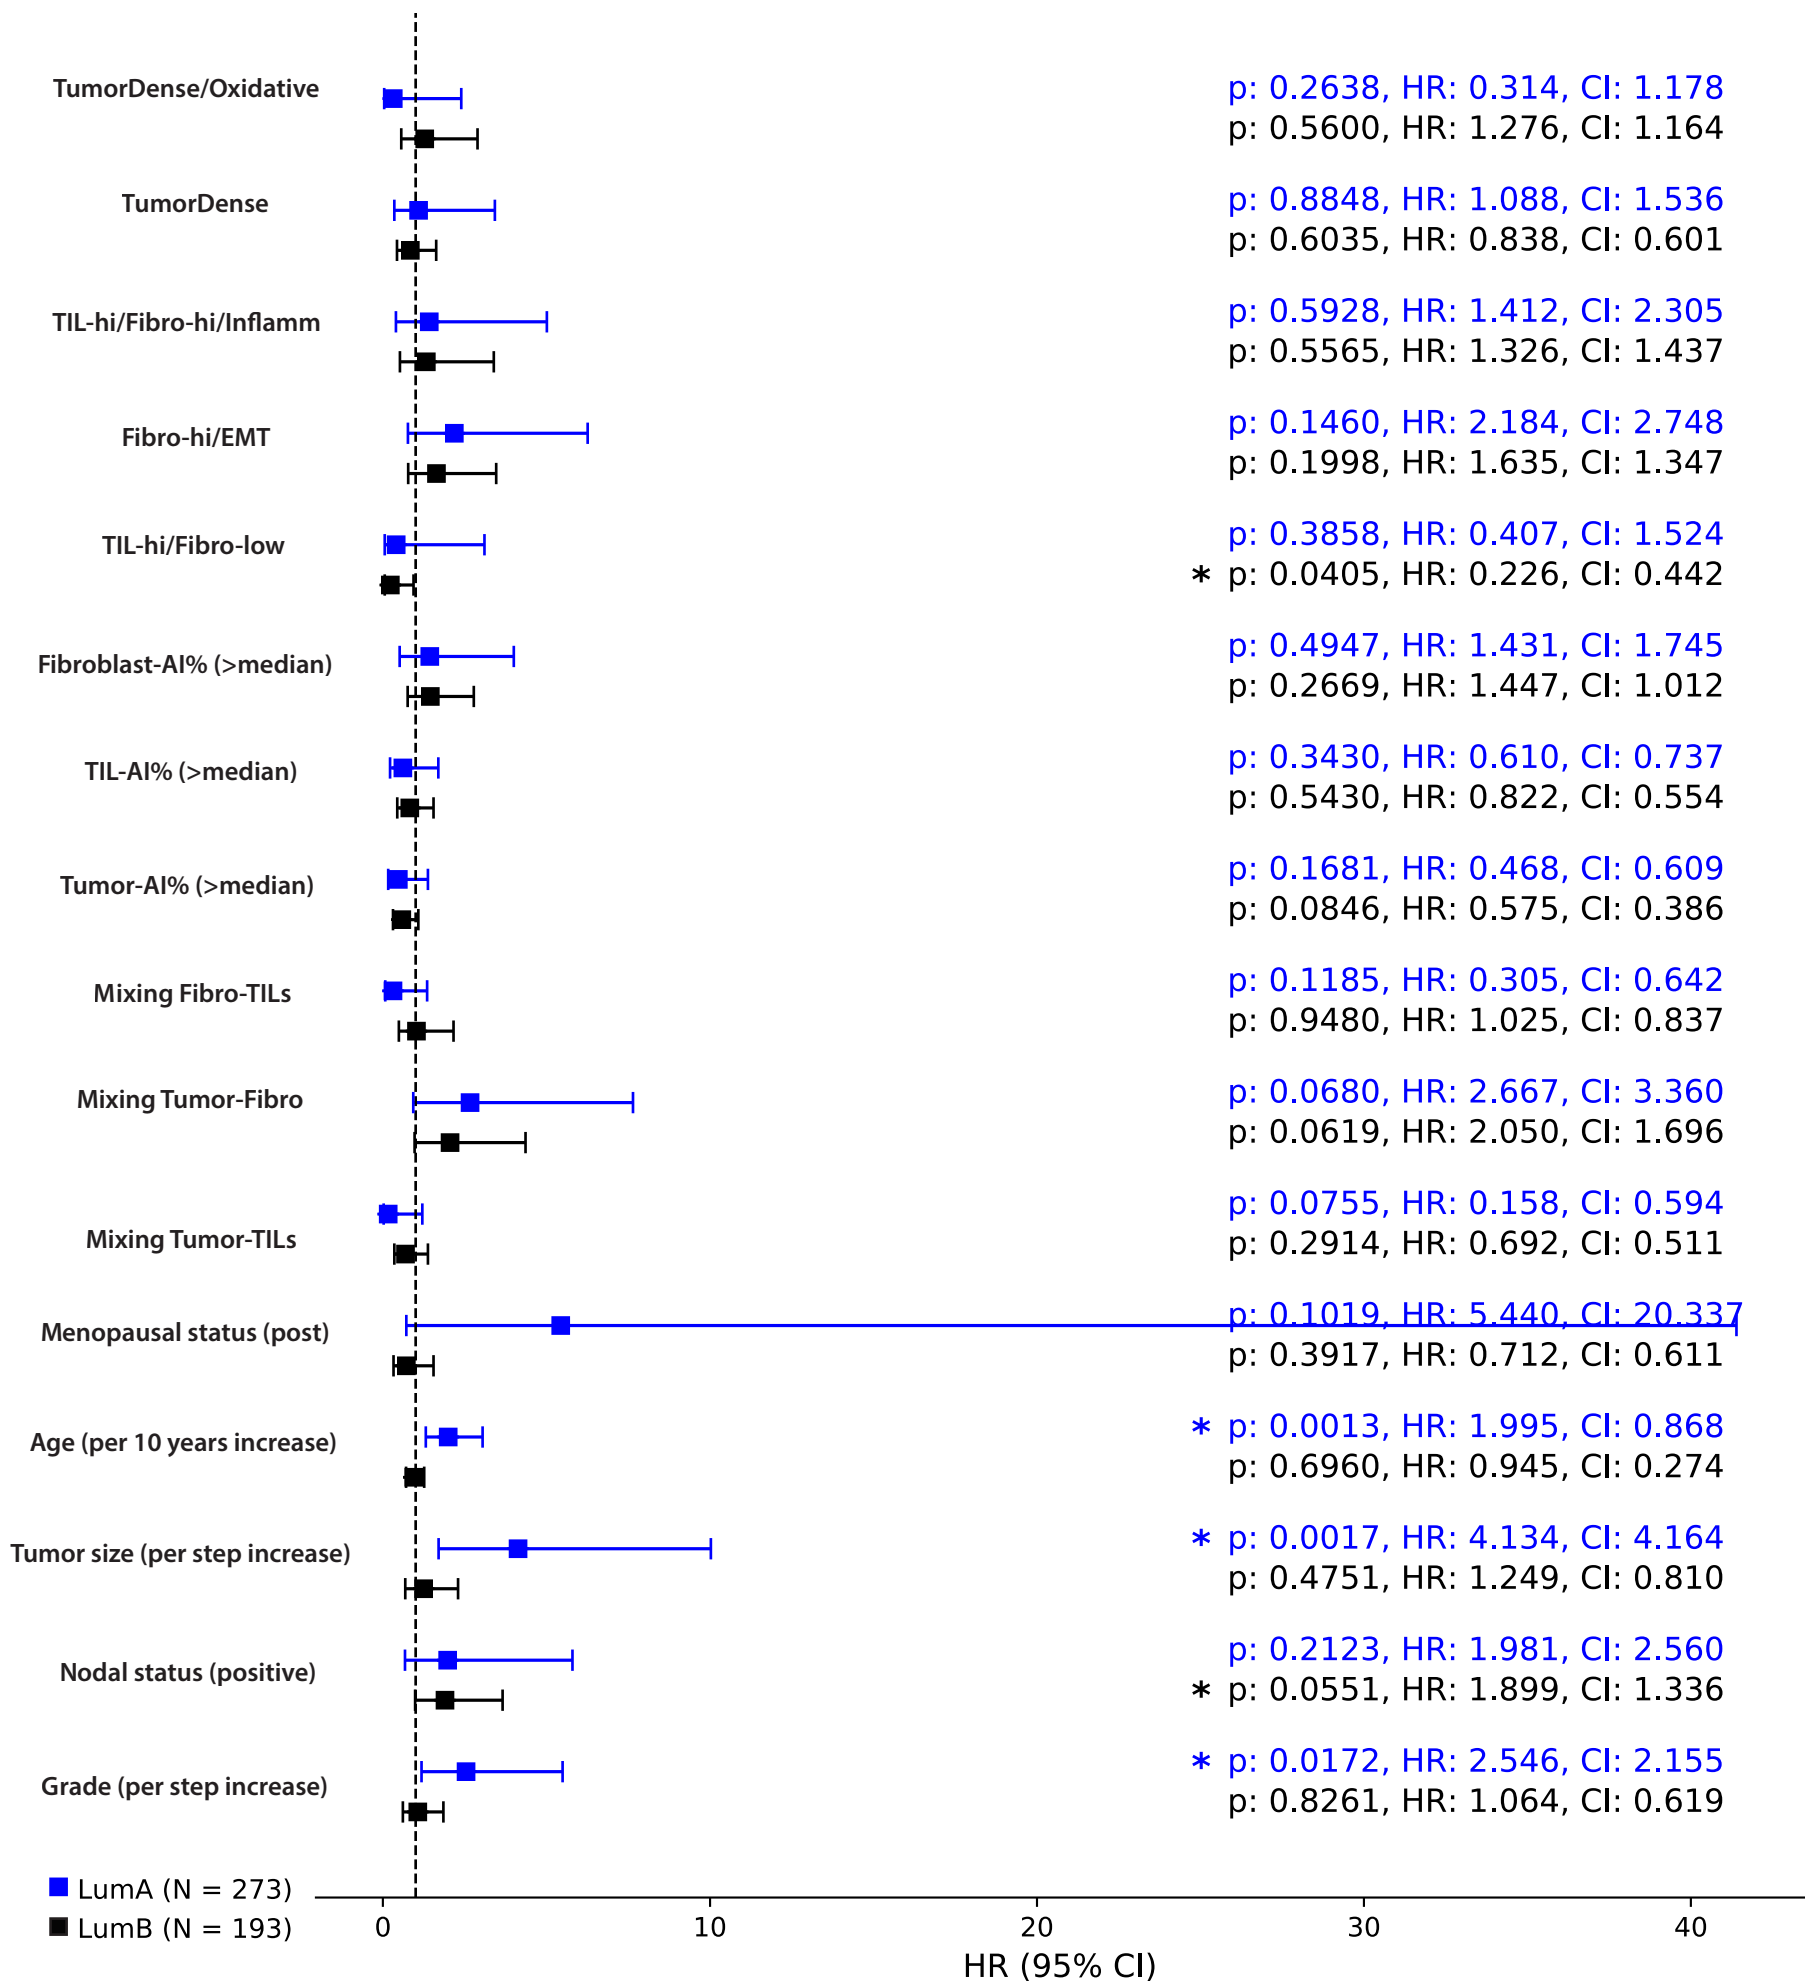

**Supplementary Figure 3. Single variate cox regression for LumA and LumB ER+HER2- patients in the METABRIC cohort.**

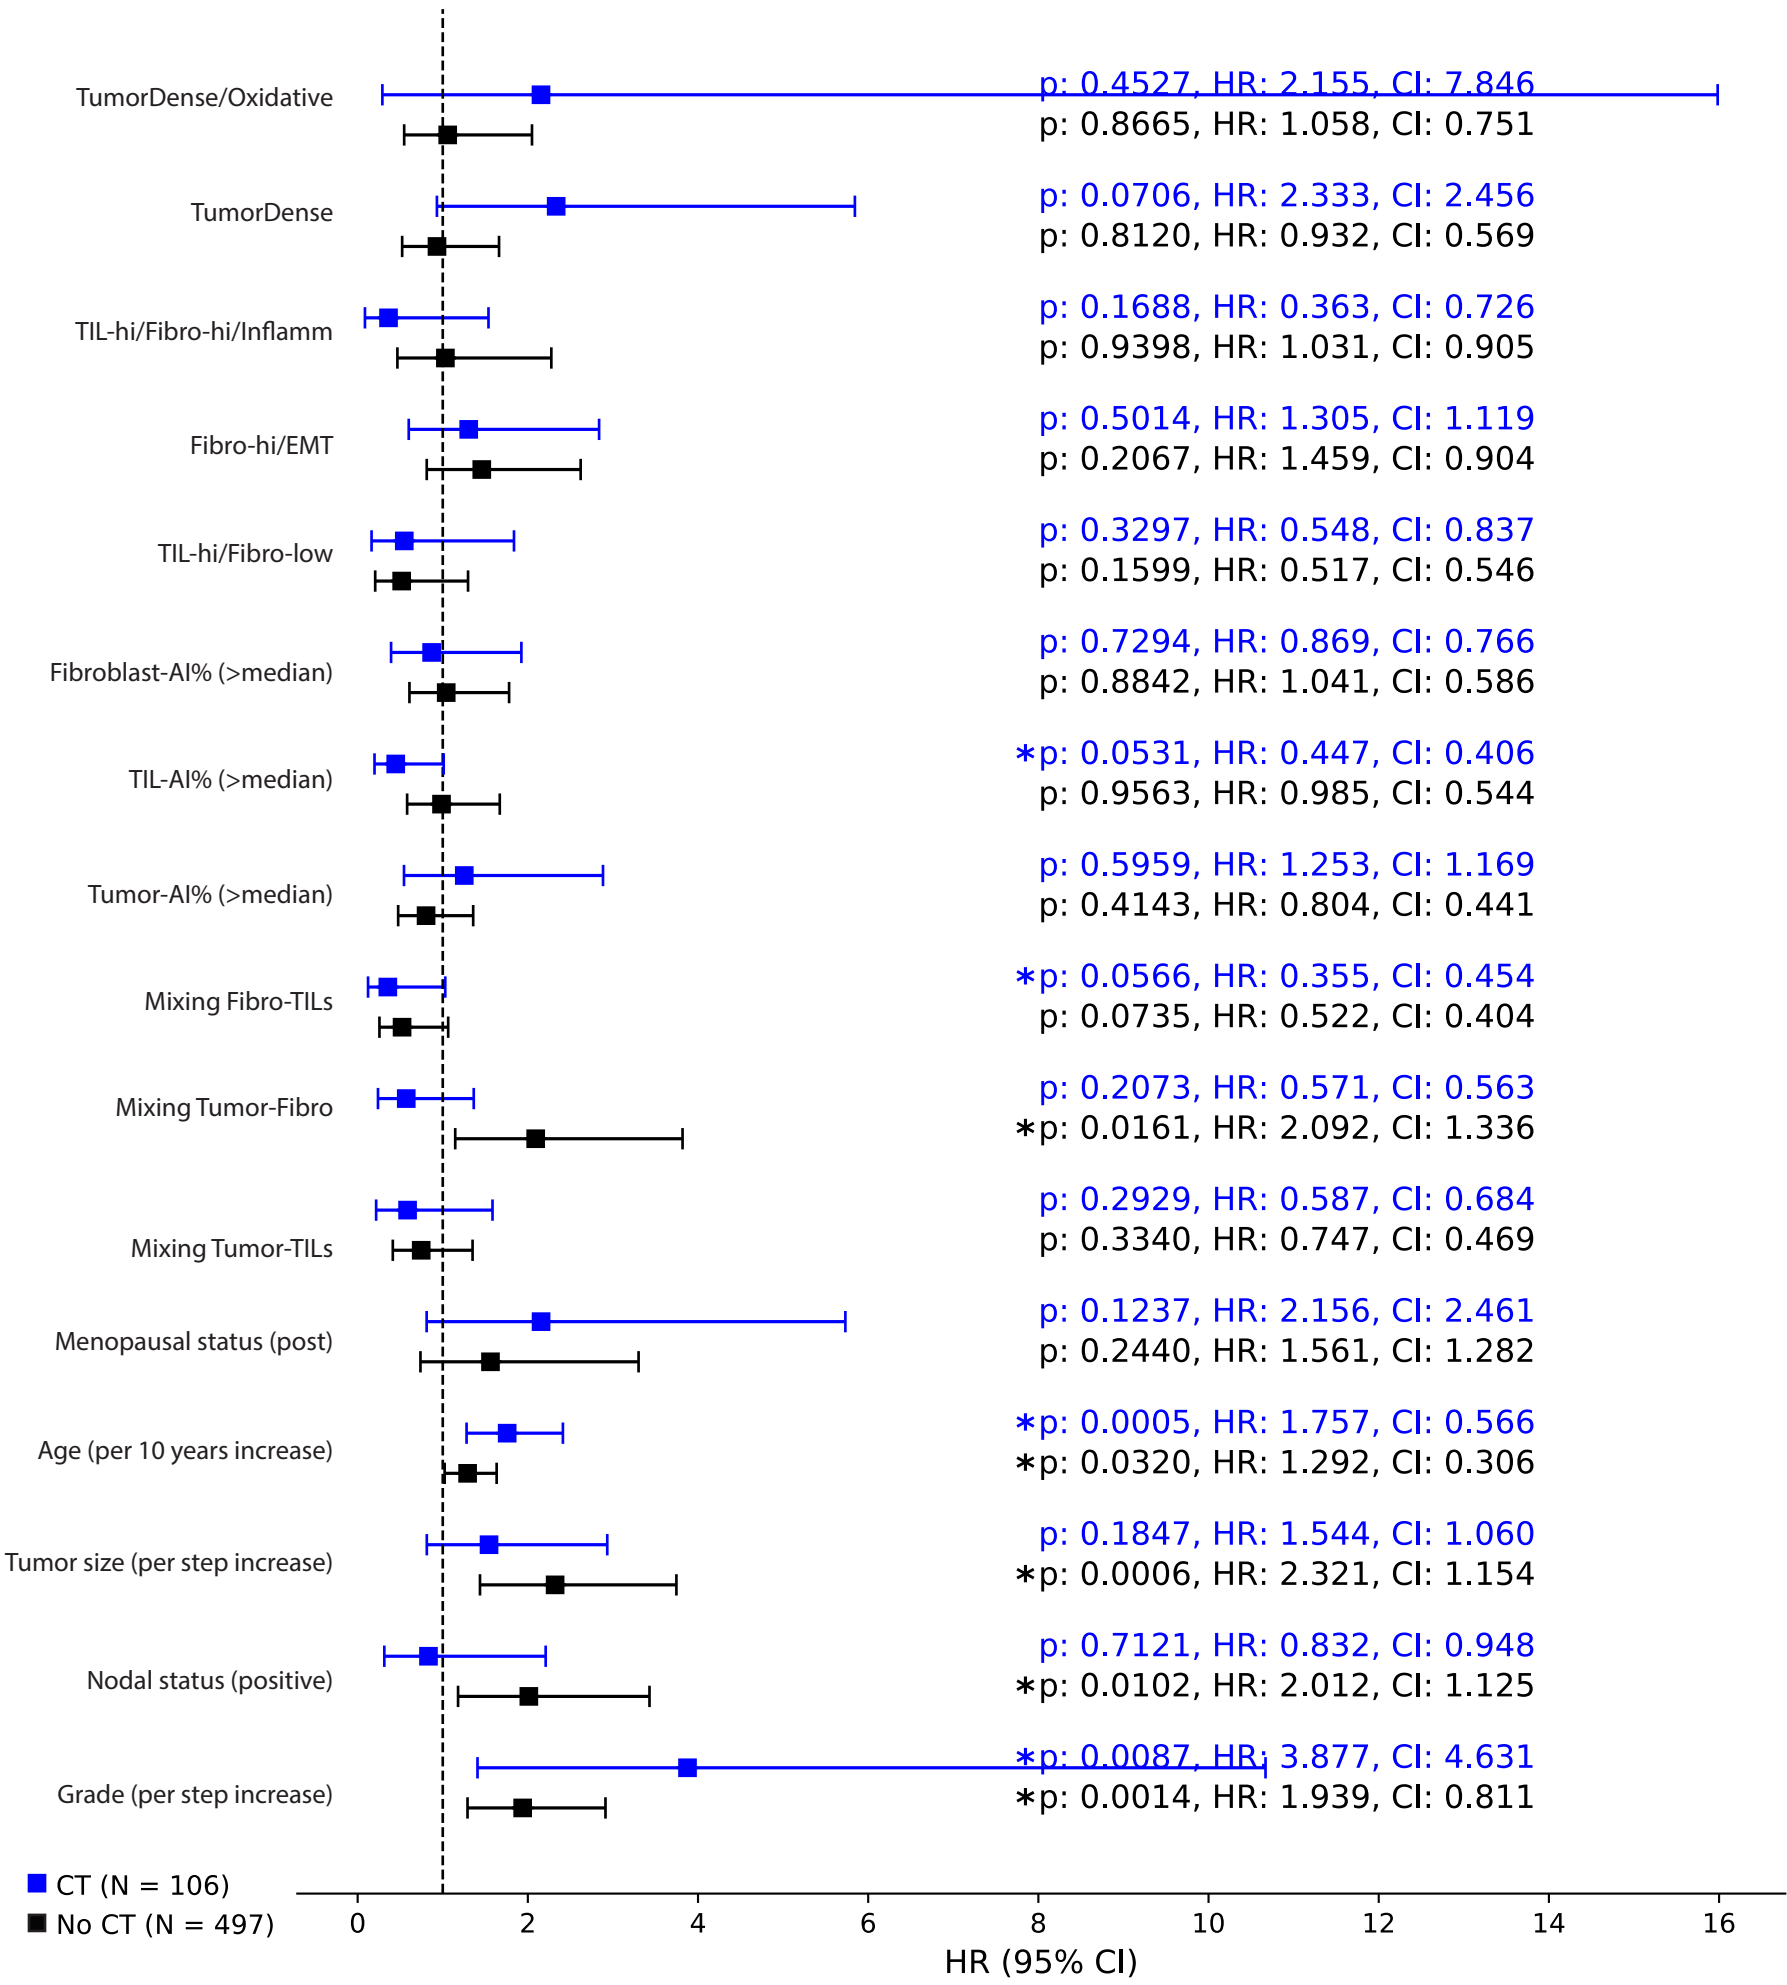

**Supplementary Figure 4. Single variate cox regression for patients that received chemotherapy or no chemotherapy in the METABRIC cohort.**

### Significance of different TILs cut-off quantiles for ER+ samples (N=753)

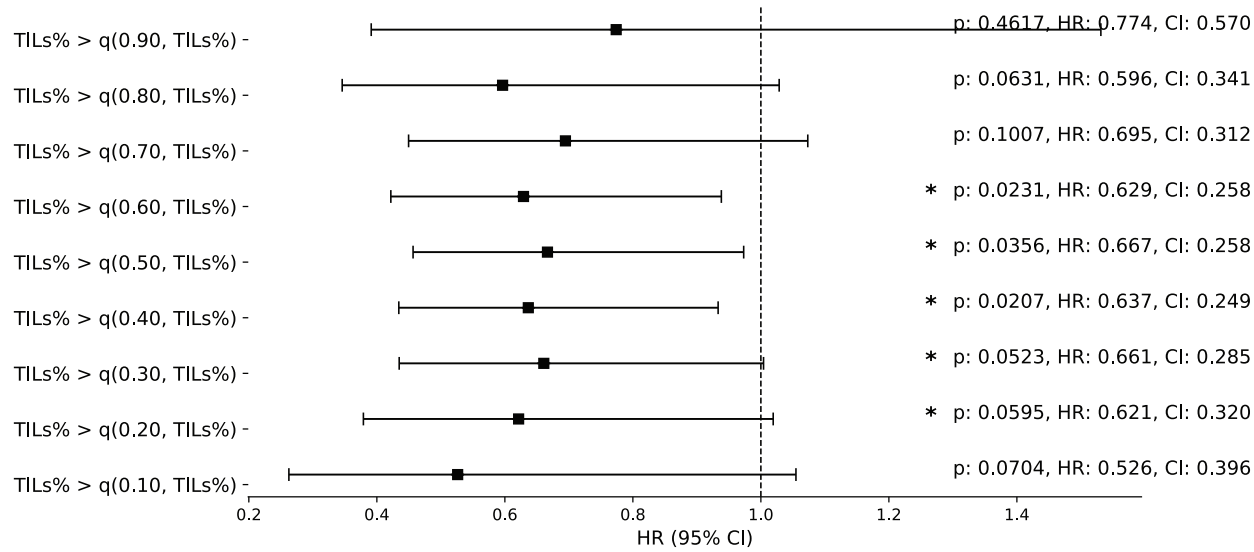

### Significance of different TILs cut-off quantiles for ER+HER2- samples (N=603)

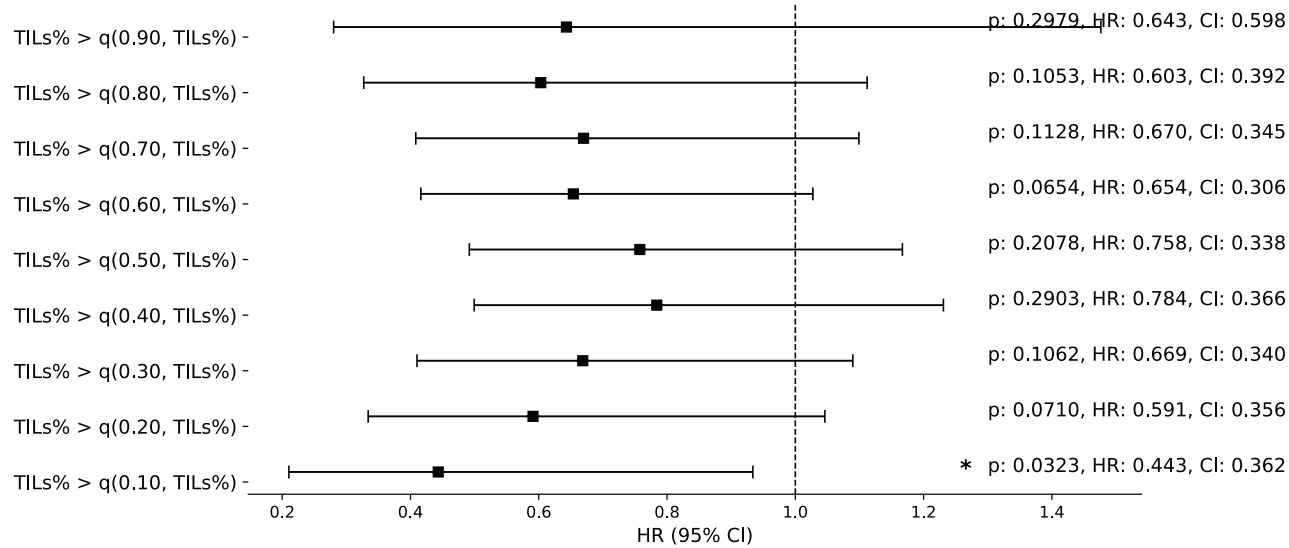

**Supplementary Figure 5: Exploring the TILs-AI cut-off in ER+ patients (METABRIC)**

**Supplementary Table 1. Average confusion matrix for the cell classification model over 5 fold**

|                             |            | Predicted  |            |        |        | Avg. Acc. |
|-----------------------------|------------|------------|------------|--------|--------|-----------|
|                             |            | Fibroblast | Lymphocyte | Tumor  | Other  |           |
| Ground Truth                | Fibroblast | 692.2      | 78.8       | 158.8  | 24.8   | 0.725     |
|                             | Lymphocyte | 83.6       | 918        | 127.2  | 6.8    | 0.808     |
|                             | Tumor      | 89.4       | 124.4      | 5934.4 | 39.4   | 0.959     |
|                             | Other      | 43.8       | 8.8        | 56.6   | 2033.8 | 0.949     |
| Overall average accuracy    |            |            |            |        |        | 0.919     |
| Normalized average accuracy |            |            |            |        |        | 0.860     |



**Supplementary Table 2. Clinical characteristics for spatial clusters in ICGC (proportions of total cohort)**

|                           | All BASIS    | TIL-hi/Fibro-low (11.1%) | Fibro-hi/EMT (22.1%) | TIL-hi/Fibro-hi/Inflam(22.1%) | TumorDense(28.1%) | TumorDense/Oxidative (16.6%) | pvalue x2 contingency |
|---------------------------|--------------|--------------------------|----------------------|-------------------------------|-------------------|------------------------------|-----------------------|
| ER status                 |              |                          |                      |                               |                   |                              | 1.2e-3                |
| Negative                  | <b>0.238</b> | 0.500                    | 0.096                | 0.288                         | 0.258             | 0.154                        |                       |
| Positive                  | <b>0.762</b> | 0.500                    | 0.904                | 0.712                         | 0.742             | 0.846                        |                       |
| N stage (Nx not reported) |              |                          |                      |                               |                   |                              | 0.473                 |
| N0                        | <b>0.349</b> | 0.346                    | 0.365                | 0.308                         | 0.318             | 0.436                        |                       |
| N1                        | <b>0.238</b> | 0.308                    | 0.404                | 0.231                         | 0.136             | 0.154                        |                       |
| N2                        | <b>0.094</b> | 0.038                    | 0.096                | 0.154                         | 0.061             | 0.103                        |                       |
| N3                        | <b>0.017</b> | 0.000                    | 0.038                | 0.019                         | 0.015             | 0.000                        |                       |
| T stage (Tx not reported) |              |                          |                      |                               |                   |                              | 0.776                 |
| T1                        | <b>0.255</b> | 0.192                    | 0.308                | 0.212                         | 0.258             | 0.282                        |                       |
| T2                        | <b>0.357</b> | 0.423                    | 0.423                | 0.404                         | 0.273             | 0.308                        |                       |
| T3                        | <b>0.085</b> | 0.115                    | 0.115                | 0.096                         | 0.015             | 0.128                        |                       |
| T4                        | <b>0.034</b> | 0.000                    | 0.058                | 0.038                         | 0.030             | 0.026                        |                       |
| Lymph Node                |              |                          |                      |                               |                   |                              | 0.178                 |
| Negative                  | <b>0.507</b> | 0.500                    | 0.400                | 0.442                         | 0.621             | 0.556                        |                       |
| Positive                  | <b>0.493</b> | 0.500                    | 0.600                | 0.558                         | 0.379             | 0.444                        |                       |
| Grade                     |              |                          |                      |                               |                   |                              | 4.7e-4                |
| 1                         | <b>0.139</b> | 0.080                    | 0.163                | 0.174                         | 0.115             | 0.143                        |                       |
| 2                         | <b>0.454</b> | 0.240                    | 0.694                | 0.348                         | 0.377             | 0.543                        |                       |
| 3                         | <b>0.407</b> | 0.680                    | 0.143                | 0.478                         | 0.508             | 0.314                        |                       |
| PAM50                     |              |                          |                      |                               |                   |                              | 0.024                 |
| Basal                     | <b>0.181</b> | 0.389                    | 0.051                | 0.235                         | 0.186             | 0.143                        |                       |
| HER2                      | <b>0.045</b> | 0.000                    | 0.051                | 0.059                         | 0.070             | 0.000                        |                       |
| LumA                      | <b>0.297</b> | 0.222                    | 0.513                | 0.294                         | 0.140             | 0.286                        |                       |
| LumB                      | <b>0.445</b> | 0.389                    | 0.385                | 0.324                         | 0.558             | 0.571                        |                       |
| Lympho-vascular invasion  |              |                          |                      |                               |                   |                              | 0.646                 |
| Absent                    | <b>0.825</b> | 0.800                    | 0.776                | 0.800                         | 0.860             | 0.886                        |                       |
| Present                   | <b>0.175</b> | 0.200                    | 0.224                | 0.200                         | 0.140             | 0.114                        |                       |
| Lymphocyte infiltration   |              |                          |                      |                               |                   |                              | 6.9e-5                |
| None                      | <b>0.113</b> | 0.001                    | 0.128                | 0.111                         | 0.082             | 0.229                        |                       |
| Mild                      | <b>0.632</b> | 0.417                    | 0.809                | 0.467                         | 0.705             | 0.629                        |                       |
| Moderate                  | <b>0.189</b> | 0.458                    | 0.064                | 0.311                         | 0.164             | 0.057                        |                       |
| Severe                    | <b>0.066</b> | 0.125                    | 0.000                | 0.111                         | 0.049             | 0.086                        |                       |
| Tumor border              |              |                          |                      |                               |                   |                              | 1.1e-4                |
| infiltrative              | <b>0.689</b> | 0.591                    | 0.826                | 0.795                         | 0.627             | 0.543                        |                       |
| pushing < 50%             | <b>0.097</b> | 0.091                    | 0.043                | 0.114                         | 0.119             | 0.114                        |                       |
| pushing > 50%             | <b>0.209</b> | 0.318                    | 0.130                | 0.068                         | 0.254             | 0.343                        |                       |
| pushing and infiltrative  | <b>0.005</b> | 0.000                    | 0.000                | 0.023                         | 0.000             | 0.000                        |                       |
| Central scar/ fibrosis    |              |                          |                      |                               |                   |                              | 0.070                 |
| Absent                    | <b>0.743</b> | 0.783                    | 0.652                | 0.837                         | 0.661             | 0.857                        |                       |
| Present                   | <b>0.257</b> | 0.217                    | 0.348                | 0.163                         | 0.339             | 0.143                        |                       |
| Necrosis                  |              |                          |                      |                               |                   |                              | 0.014                 |
| Absent                    | <b>0.777</b> | 0.609                    | 0.927                | 0.850                         | 0.712             | 0.735                        |                       |
| Present                   | <b>0.223</b> | 0.391                    | 0.073                | 0.150                         | 0.288             | 0.265                        |                       |
| TP53                      |              |                          |                      |                               |                   |                              | 0.031                 |
| Negative                  | <b>0.651</b> | 0.423                    | 0.769                | 0.596                         | 0.652             | 0.718                        |                       |
| Positive                  | <b>0.349</b> | 0.577                    | 0.231                | 0.404                         | 0.348             | 0.282                        |                       |
| MYC                       |              |                          |                      |                               |                   |                              | 0.327                 |
| Negative                  | <b>0.826</b> | 0.808                    | 0.904                | 0.788                         | 0.773             | 0.872                        |                       |
| Positive                  | <b>0.174</b> | 0.192                    | 0.096                | 0.212                         | 0.227             | 0.128                        |                       |
| PTEN                      |              |                          |                      |                               |                   |                              | 0.675                 |
| Negative                  | <b>0.838</b> | 0.808                    | 0.827                | 0.788                         | 0.879             | 0.872                        |                       |
| Positive                  | <b>0.162</b> | 0.192                    | 0.173                | 0.212                         | 0.121             | 0.128                        |                       |
| PIK3CA                    |              |                          |                      |                               |                   |                              | 0.953                 |
| Negative                  | <b>0.672</b> | 0.731                    | 0.654                | 0.673                         | 0.682             | 0.641                        |                       |
| Positive                  | <b>0.328</b> | 0.269                    | 0.346                | 0.327                         | 0.318             | 0.359                        |                       |
| PR status                 |              |                          |                      |                               |                   |                              | 2.4e-3                |
| Negative                  | <b>0.319</b> | 0.538                    | 0.137                | 0.373                         | 0.379             | 0.237                        |                       |
| Positive                  | <b>0.681</b> | 0.462                    | 0.863                | 0.627                         | 0.621             | 0.763                        |                       |

**Supplementary Table 3. Clinical characteristics for spatial clusters in METABRIC (proportions of total cohort)**

|                         | All METABRIC | TIL-hi/Fibro-hi/Inflam<br>(13.2%) | TIL-hi/Fibro-low (12.6%) | TIL-med/Fibro-hi/EMT<br>(28.3%) | TumorDense/ Oxidative<br>(29.2%) | Fibro-med/TIL-low (3.6%) | TumorDense (13.1%) | p-v $\chi^2$ contingency |
|-------------------------|--------------|-----------------------------------|--------------------------|---------------------------------|----------------------------------|--------------------------|--------------------|--------------------------|
| ER status               |              |                                   |                          |                                 |                                  |                          |                    | 0.012                    |
| Negative                | <b>0.221</b> | 0.231                             | 0.202                    | 0.154                           | 0.267                            | 0.167                    | 0.287              |                          |
| Positive                | <b>0.779</b> | 0.769                             | 0.798                    | 0.846                           | 0.733                            | 0.833                    | 0.713              |                          |
| Lymph Node              |              |                                   |                          |                                 |                                  |                          |                    | 0.383                    |
| Negative                | <b>0.476</b> | 0.504                             | 0.552                    | 0.441                           | 0.458                            | 0.514                    | 0.481              |                          |
| Positive                | <b>0.524</b> | 0.496                             | 0.448                    | 0.559                           | 0.542                            | 0.486                    | 0.519              |                          |
| Grade                   |              |                                   |                          |                                 |                                  |                          |                    | 0.186                    |
| 1                       | <b>0.111</b> | 0.109                             | 0.124                    | 0.119                           | 0.087                            | 0.057                    | 0.150              |                          |
| 2                       | <b>0.373</b> | 0.403                             | 0.331                    | 0.418                           | 0.332                            | 0.486                    | 0.354              |                          |
| 3                       | <b>0.516</b> | 0.487                             | 0.545                    | 0.463                           | 0.580                            | 0.457                    | 0.496              |                          |
| TP53                    |              |                                   |                          |                                 |                                  |                          |                    | 4.0e-3                   |
| Negative                | <b>0.886</b> | 0.901                             | 0.831                    | 0.881                           | 0.917                            | 0.727                    | 0.926              |                          |
| Positive                | <b>0.114</b> | 0.099                             | 0.169                    | 0.119                           | 0.083                            | 0.273                    | 0.074              |                          |
| PAM50 (NC not rep.)     |              |                                   |                          |                                 |                                  |                          |                    | 0.030                    |
| Basal                   | <b>0.174</b> | 0.174                             | 0.160                    | 0.153                           | 0.196                            | 0.167                    | 0.183              |                          |
| HER2                    | <b>0.110</b> | 0.129                             | 0.104                    | 0.085                           | 0.113                            | 0.056                    | 0.160              |                          |
| LumA                    | <b>0.334</b> | 0.356                             | 0.336                    | 0.370                           | 0.285                            | 0.361                    | 0.336              |                          |
| LumB                    | <b>0.265</b> | 0.182                             | 0.328                    | 0.178                           | 0.347                            | 0.278                    | 0.290              |                          |
| Chemo-therapy           |              |                                   |                          |                                 |                                  |                          |                    | 0.159                    |
| Not treated             | <b>0.715</b> | 0.728                             | 0.660                    | 0.712                           | 0.749                            | 0.763                    | 0.667              |                          |
| Treated                 | <b>0.285</b> | 0.272                             | 0.340                    | 0.288                           | 0.251                            | 0.237                    | 0.333              |                          |
| Hormone-therapy         |              |                                   |                          |                                 |                                  |                          |                    | 0.0017                   |
| Not treated             | <b>0.298</b> | 0.352                             | 0.223                    | 0.341                           | 0.309                            | 0.382                    | 0.139              |                          |
| Treated                 | <b>0.702</b> | 0.648                             | 0.777                    | 0.659                           | 0.691                            | 0.618                    | 0.861              |                          |
| HER2                    |              |                                   |                          |                                 |                                  |                          |                    | 0.2467                   |
| Negative                | <b>0.801</b> | 0.824                             | 0.819                    | 0.841                           | 0.753                            | 0.809                    | 0.806              |                          |
| Positive                | <b>0.199</b> | 0.176                             | 0.181                    | 0.159                           | 0.247                            | 0.191                    | 0.194              |                          |
| Lymphocyte infiltration |              |                                   |                          |                                 |                                  |                          |                    | 0.0095                   |
| None                    | <b>0.192</b> | 0.284                             | 0.123                    | 0.202                           | 0.194                            | 0.270                    | 0.172              |                          |
| Mild                    | <b>0.636</b> | 0.545                             | 0.749                    | 0.615                           | 0.606                            | 0.554                    | 0.552              |                          |
| Severe                  | <b>0.172</b> | 0.171                             | 0.128                    | 0.183                           | 0.200                            | 0.176                    | 0.276              |                          |

**Supplementary Table 4. GSEA statistics output for the ICGC cohort. attached excel file)**

**Supplementary Table 5. GSEA statistics output for the METABRIC cohort. (attached excel file)**

**Supplementary Table 6. Overview of HER2 status in ER+ samples H&E slide dataset METABRIC**

| <b>Cluster</b>         | <b>ER+, count (n=753)</b> | <b>ER+HER2-, count (n=630)</b> | <b>ER+HER2+, count (n=123)</b> |
|------------------------|---------------------------|--------------------------------|--------------------------------|
| TIL-hi/Fibro-hi/Inflam | 93 (12.4%)                | 82 (13.0%)                     | 11 (8.9%)                      |
| TIL-hi/Fibro-low       | 99 (13.2%)                | 85 (13.5%)                     | 14 (11.4%)                     |
| TIL-med/Fibro-hi/EMT   | 230 (30.5%)               | 197 (31.3%)                    | 33 (26.9%)                     |
| TumorDense             | 209 (27.8%)               | 164 (26.0%)                    | 45 (36.6%)                     |
| Fibro-med/TIL-low      | 30 (3.9%)                 | 25 (3.7%)                      | 5 (4.1%)                       |
| TumorDense/Oxidative   | 92 (12.2%)                | 77 (12.2%)                     | 15 (12.2%)                     |

**Supplementary Table 7. Samples of the ICGC used for training of the model**

| Sample ID | Subtype     |
|-----------|-------------|
| PD4267    | ER+PR+HER2- |
| PD18257   | ER+PR+HER2- |
| PD13627   | ER-PR-HER2- |
| PD11816   | ER+PR+HER2- |
| PD14435   | ER+PR+HER2- |
| PD14437   | ER+PR+HER2- |
| PD13631   | ER+PR+HER2- |
| PD13622   | ER-PR-HER2- |
| PD13620   | ER+PR+HER2- |
| PD4072    | ER+PR+HER2- |
| PD9539    | ER+PR+HER2- |
| PD4986    | ER+PR+HER2- |
| PD9579    | ER-PR-HER2- |
| PD18251   | ER+PR+HER2- |
| PD4959    | ER+PR+HER2- |
| PD4962    | ER+PR+HER2- |
| PD4965    | ER+PR+HER2- |
| PD4967    | ER+PR+HER2- |
